# Supplementary material for: Interactions of Sodium Salicylate with β-Cyclodextrin and an Anionic Resorcin[4]arene: Mutual Diffusion Coefficients and Computational Study
Source: MDPI journal article supplement (doi:10.3390/ijms24043921), 2023-02-15
Supplement: s1 [file s1]

## Supplementary Materials

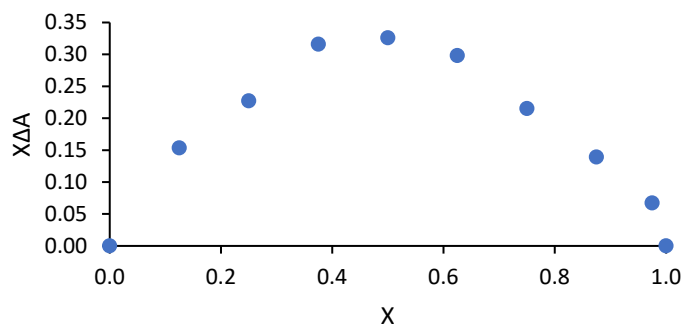

**Figure S1.** Job plot obtained for the system  $\beta$ -CD-NaSal.

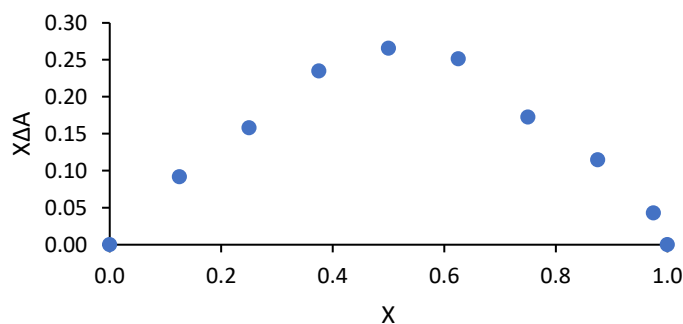

**Figure S2.** Job plot obtained for the system Na<sub>4</sub>EtRA-NaSal.

**Table S1.** Energy variation of different  $\beta$ -CD-NaSal complexes.

| Complex/Property        | Hydroxyl end-on | Aromatic end-on | Inclusion outer-side complex | Upper outer-side complex | Bottom outer-side complex |
|-------------------------|-----------------|-----------------|------------------------------|--------------------------|---------------------------|
| $\Delta E_c$ (kcal/mol) | -36.255         | -33.487         | -30.119                      | -26.518                  | -31.984                   |

**Table S2.** Energy variation of different Na<sub>4</sub>EtRA-NaSal complexes.

| Complex/Property        | Hydroxyl end-on | Aromatic end-on | Upper outer-side complex |
|-------------------------|-----------------|-----------------|--------------------------|
| $\Delta E_c$ (kcal/mol) | -17.5290        | -18.0918        | -20.362                  |

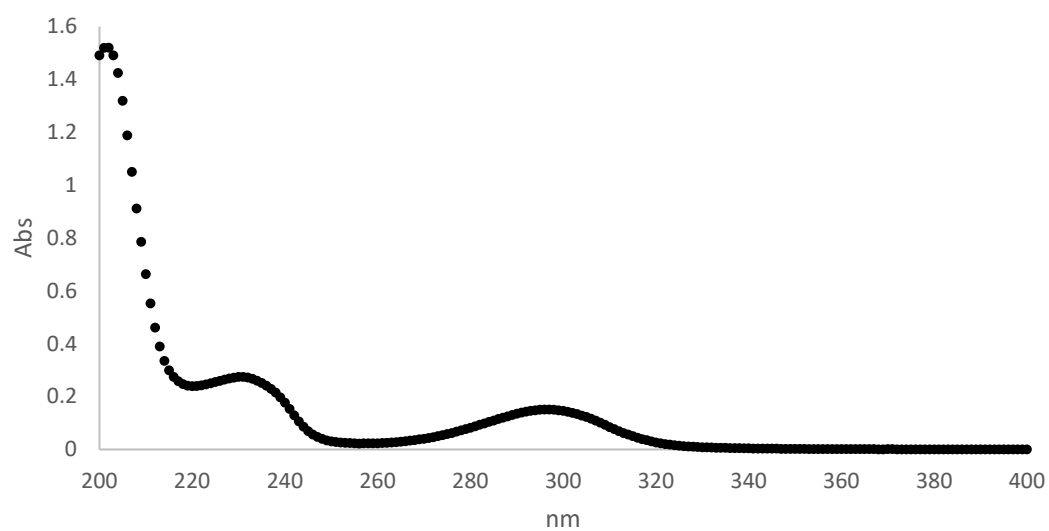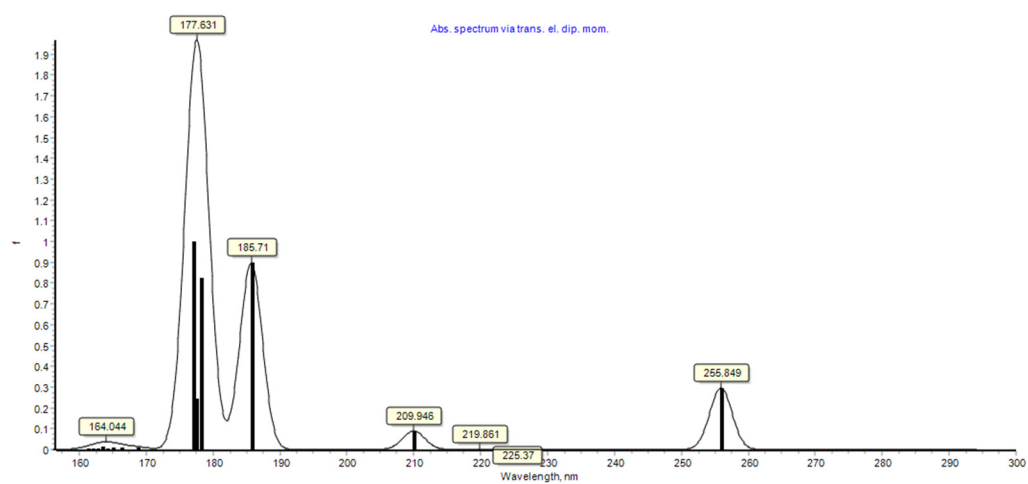

**Figure S3.** Upper: Experimental absorption spectrum of B-CD-NaSal complex. Bottom: Simulated absorption spectrum of B-CD-NaSal complex.

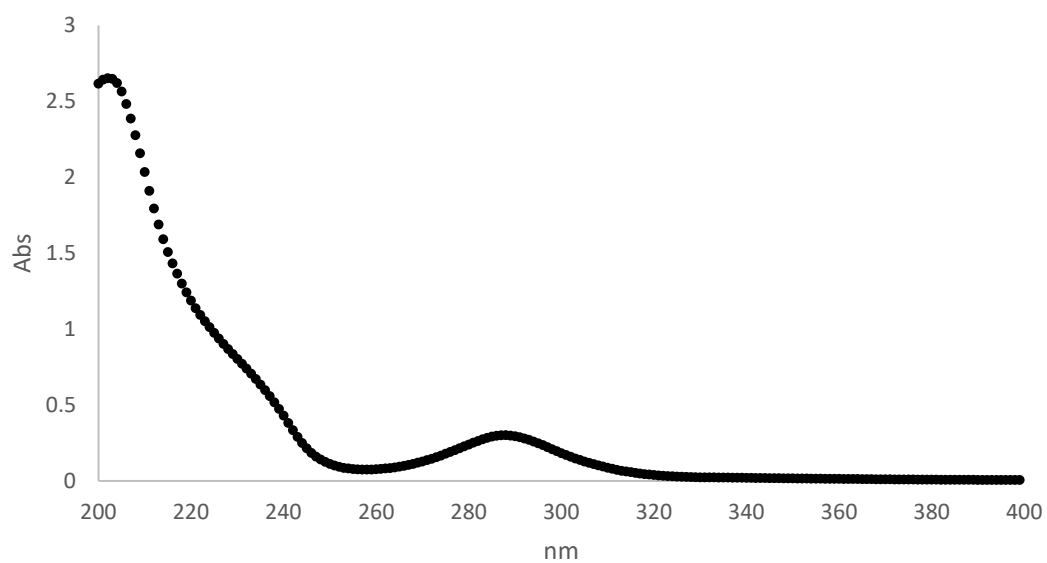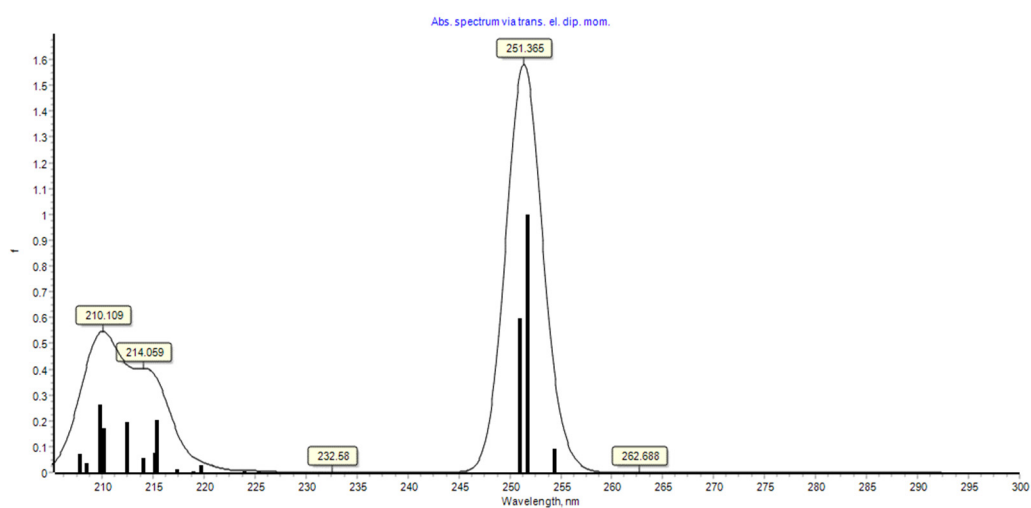

**Figure S4.** Upper: Experimental absorption spectrum of Na<sub>4</sub>EtSN-NaSal complex. Bottom: Simulated absorption spectrum of Na<sub>4</sub>EtSN-NaSal complex.
